# Supplementary material for: Fatty acid analogue N-arachidonoyl taurine restores function of IKs channels with diverse long QT mutations
Source: eLife journal article supplement (doi:10.7554/elife.20272), 2016-09-30
Supplement: supp [file elife-20272-supp-v1.zip]

Archive with 16 entries (16 files):
- elife_poa_e20272_Supplementary_File_3.docx
- elife_poa_e20272_Figure_1_figure_supplement_1.pdf
- elife_poa_e20272_Figure_4_figure_supplement_1.pdf
- elife_poa_e20272_Figure_3_figure_supplement_2.pdf
- elife_poa_e20272_Figure_4_figure_supplement_3.pdf
- elife_poa_e20272_Figure_1_figure_supplement_2.pdf
- elife_poa_e20272_Supplementary_File_1.docx
- elife_poa_e20272_Supplementary_File_4.docx
- elife_poa_e20272_Figure_3_figure_supplement_3.pdf
- elife_poa_e20272_Figure_1_figure_supplement_4.pdf
- elife_poa_e20272_Figure_1_figure_supplement_3.pdf
- elife_poa_e20272_Figure_5_figure_supplement_1.pdf
- elife_poa_e20272_Figure_4_figure_supplement_4.pdf
- elife_poa_e20272_Figure_4_figure_supplement_2.pdf
- elife_poa_e20272_Figure_3_figure_supplement_1.pdf
- elife_poa_e20272_Supplementary_File_2.docx
