# Supplementary figures and images for: Fatty acid analogue N-arachidonoyl taurine restores function of IKs channels with diverse long QT mutations
Source: eLife journal article supplement (doi:10.7554/elife.20272), 2016-09-30

Figure 1 – figure supplement 1

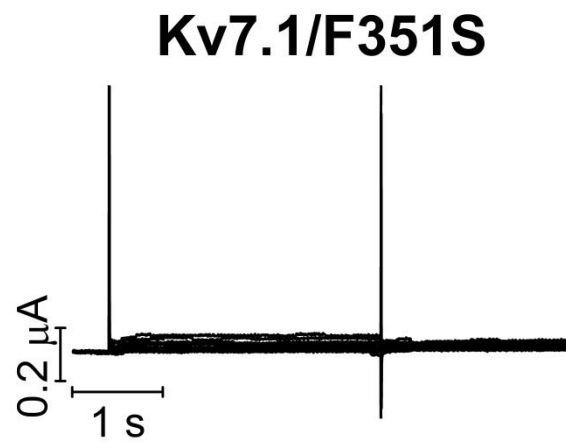

Supplement: supp [file elife-20272-supp-v1.zip › elife_poa_e20272_Figure_1_figure_supplement_1.pdf]

**Figure 4 – figure supplement 1**

**a**

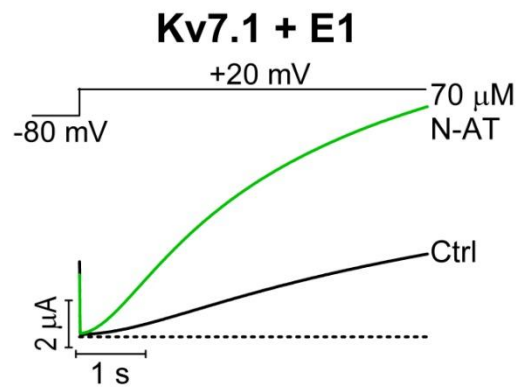

**b**

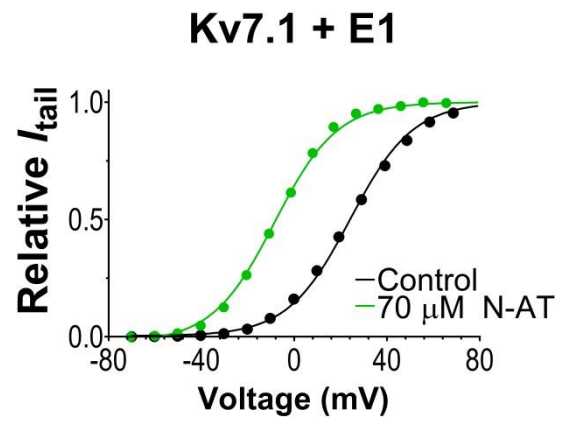

Supplement: supp [file elife-20272-supp-v1.zip › elife_poa_e20272_Figure_4_figure_supplement_1.pdf]

Figure 3 - figure supplement 2

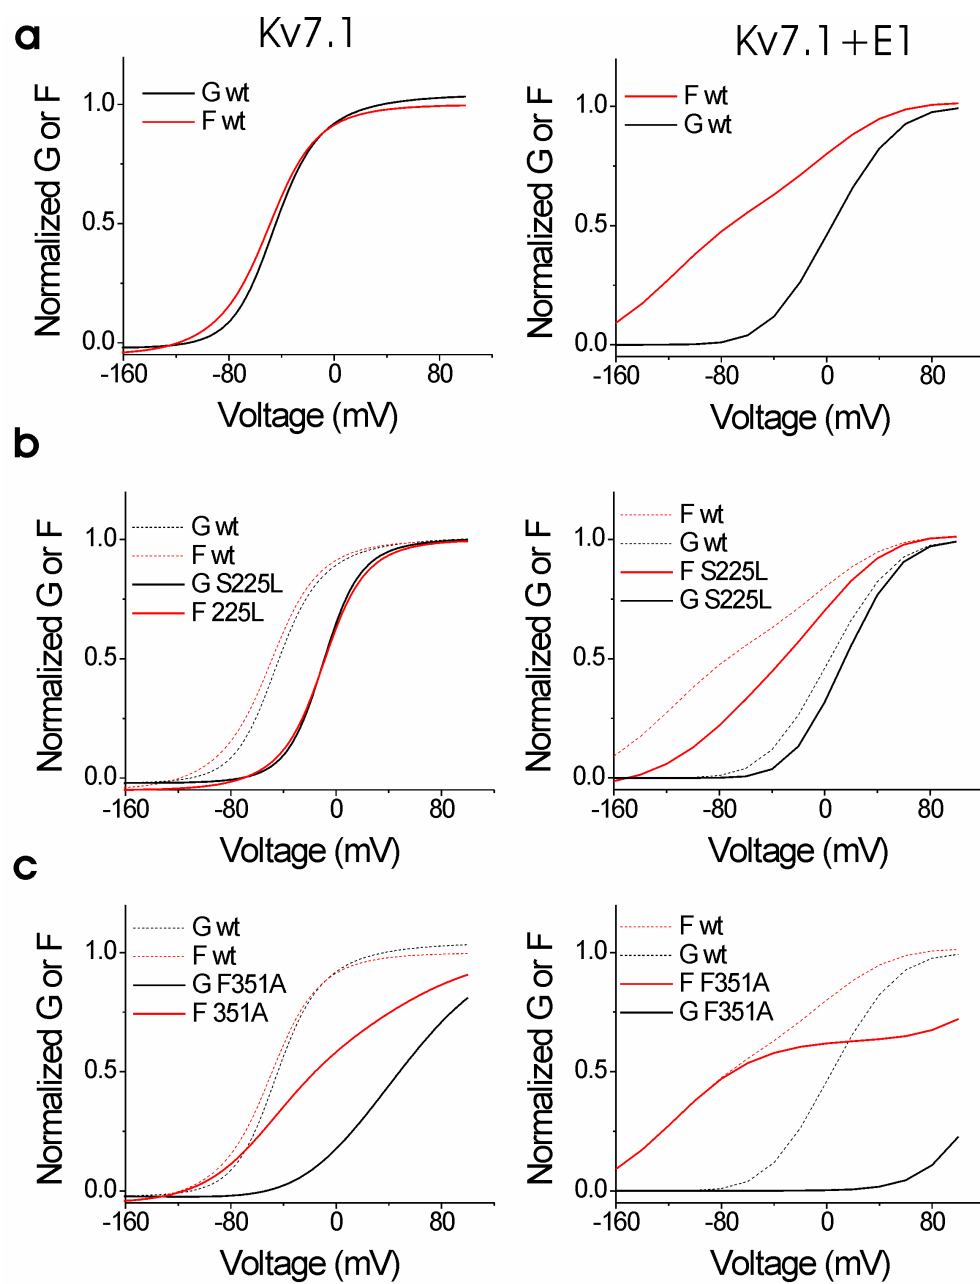

Supplement: supp [file elife-20272-supp-v1.zip › elife_poa_e20272_Figure_3_figure_supplement_2.pdf]

Figure 4 – figure supplement 3

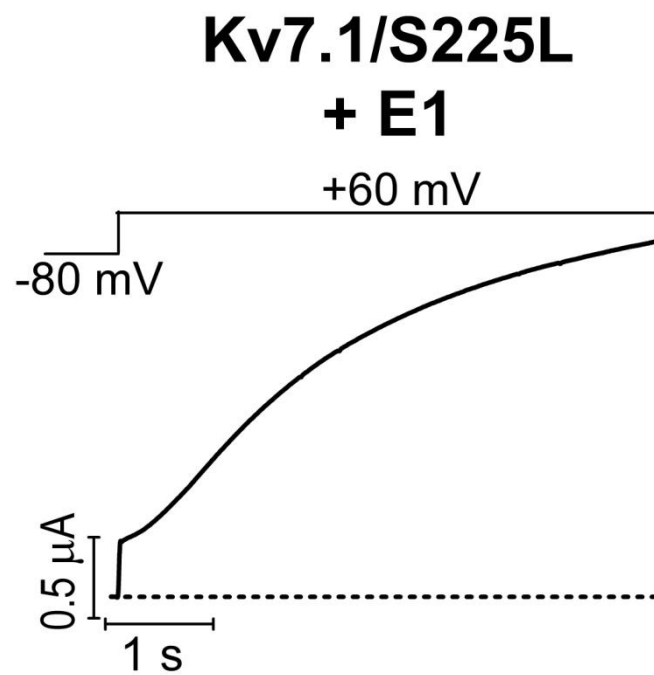

Supplement: supp [file elife-20272-supp-v1.zip › elife_poa_e20272_Figure_4_figure_supplement_3.pdf]

Figure 1 – figure supplement 2

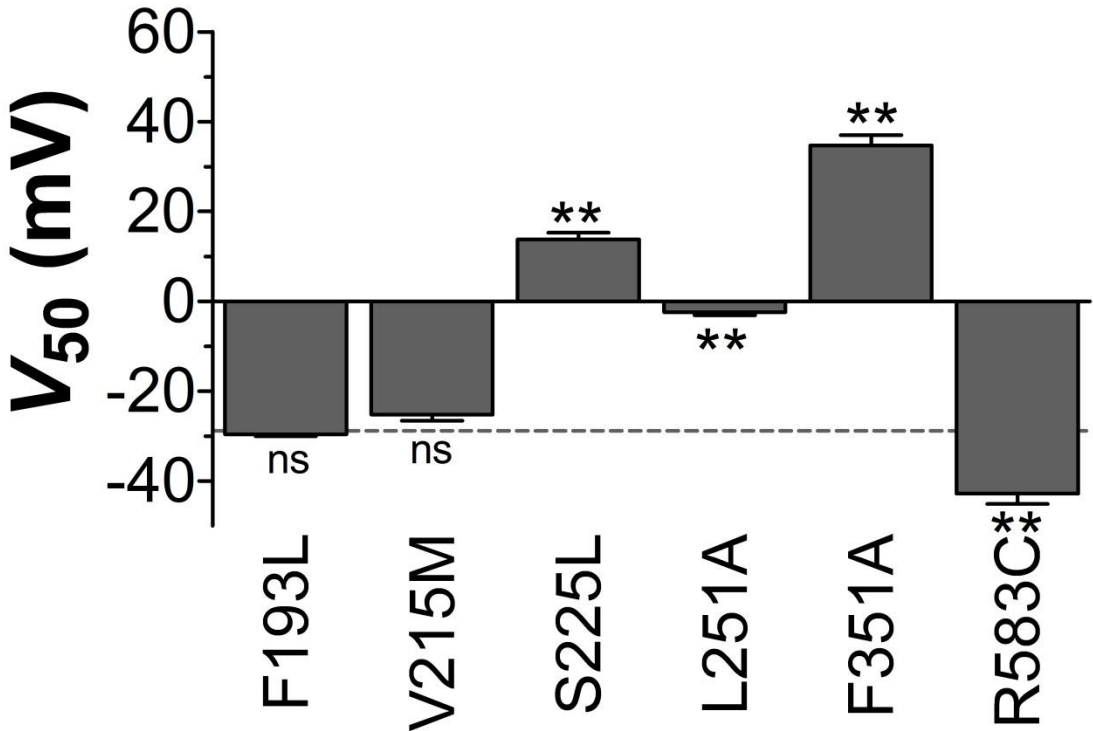

Supplement: supp [file elife-20272-supp-v1.zip › elife_poa_e20272_Figure_1_figure_supplement_2.pdf]

Figure 3 – figure supplement 3

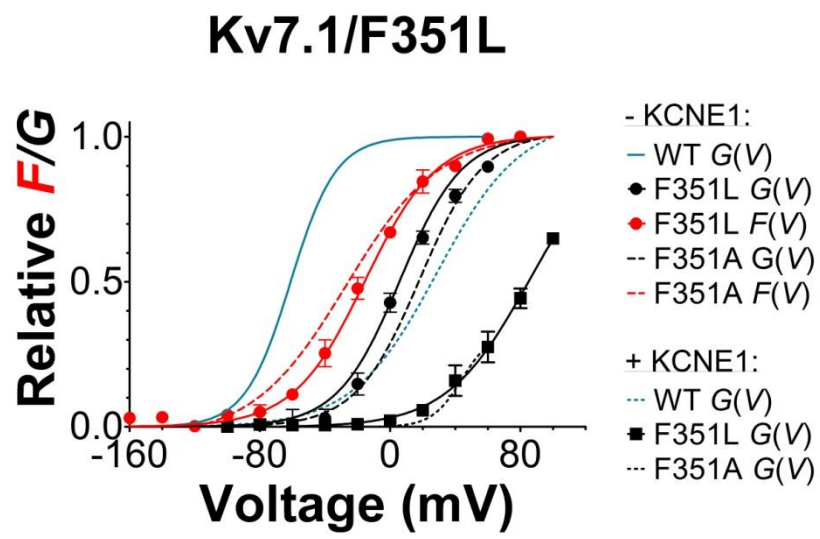

Supplement: supp [file elife-20272-supp-v1.zip › elife_poa_e20272_Figure_3_figure_supplement_3.pdf]

**b**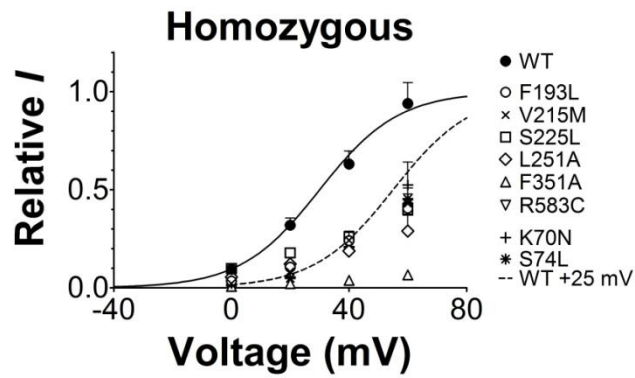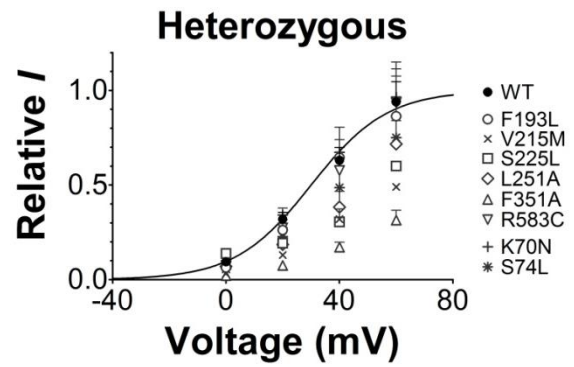

**c**

**d**

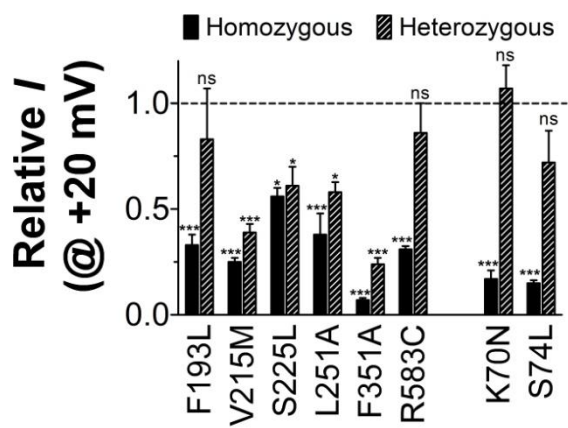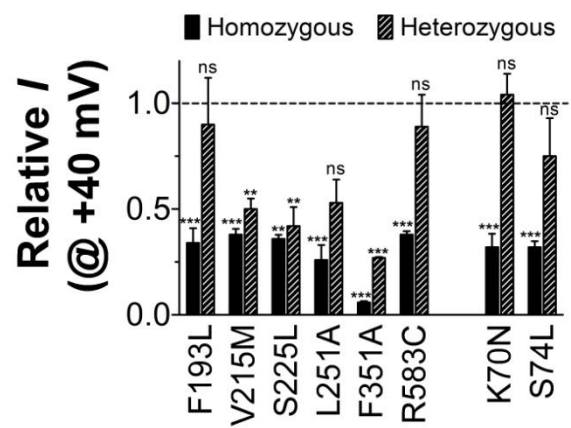

Supplement: supp [file elife-20272-supp-v1.zip › elife_poa_e20272_Figure_1_figure_supplement_4.pdf]

Figure 1 – figure supplement 3

**a**

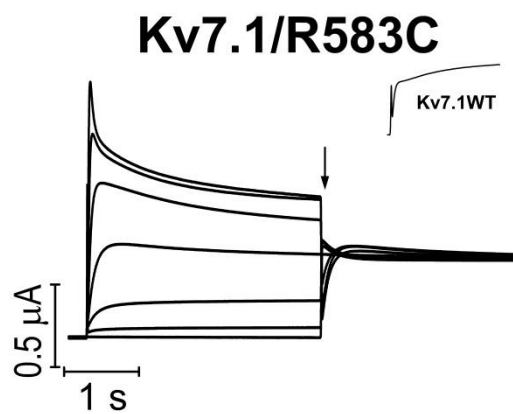

**b**

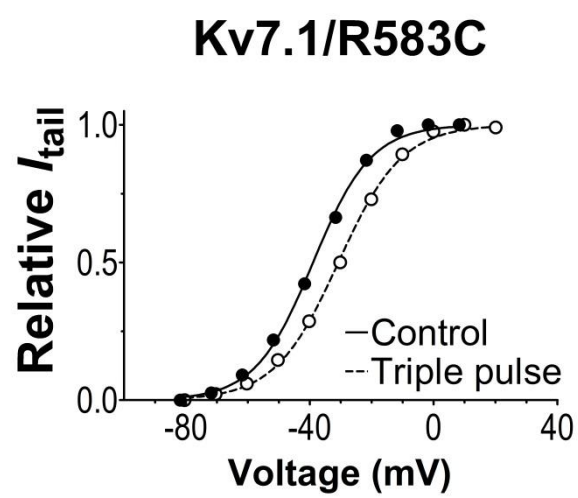

Supplement: supp [file elife-20272-supp-v1.zip › elife_poa_e20272_Figure_1_figure_supplement_3.pdf]

Figure 5 – figure supplement 1

a

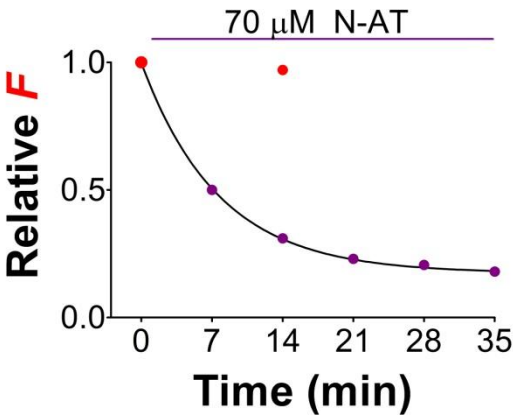

b

|             | $F_{\text{Alexa488}}$ (A.U.) |
|-------------|------------------------------|
| Control     | $1.43 \pm 0.04$              |
| 0.25 M N-AT | $1.60 \pm 0.07$              |
| 0.5 M N-AT  | $1.78 \pm 0.06$              |

c

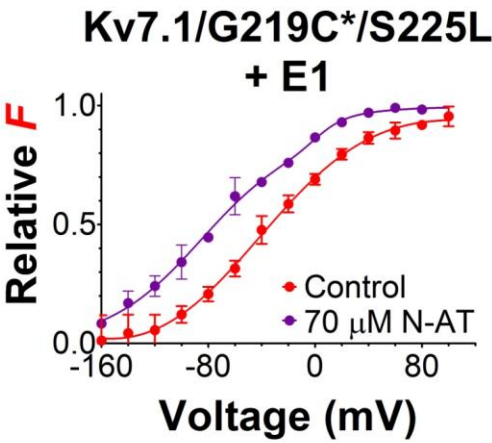

Supplement: supp [file elife-20272-supp-v1.zip › elife_poa_e20272_Figure_5_figure_supplement_1.pdf]

Figure 4 – figure supplement 4

a

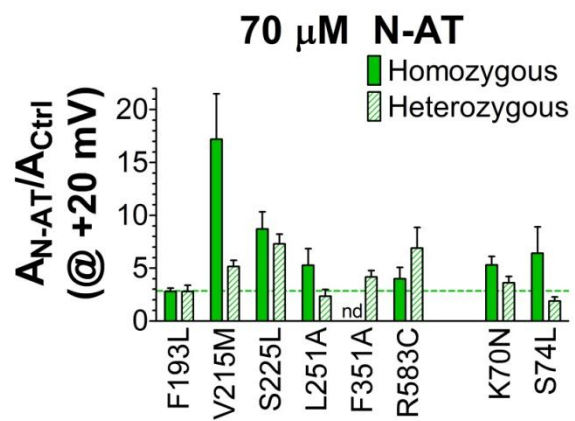

b

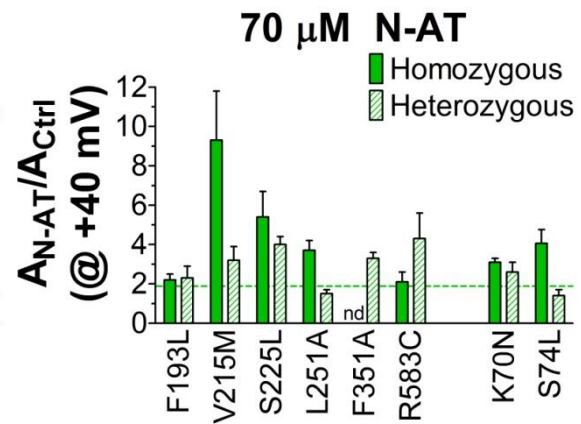

c

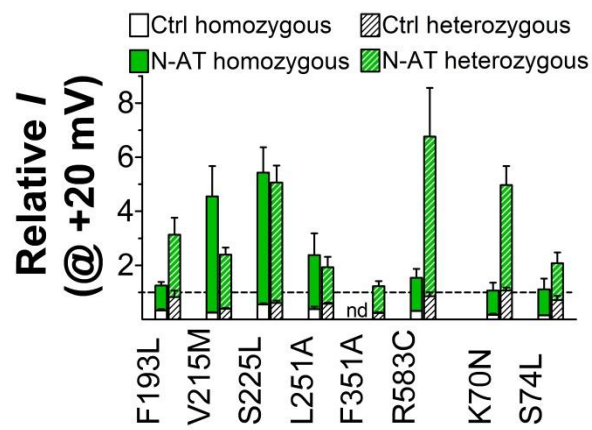

Supplement: supp [file elife-20272-supp-v1.zip › elife_poa_e20272_Figure_4_figure_supplement_4.pdf]

Figure 4 – figure supplement 2

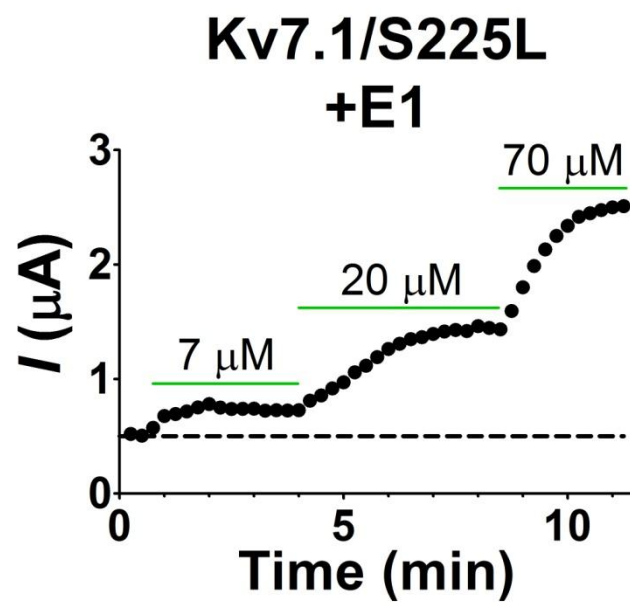

Supplement: supp [file elife-20272-supp-v1.zip › elife_poa_e20272_Figure_4_figure_supplement_2.pdf]

Figure 3 - figure supplement 1

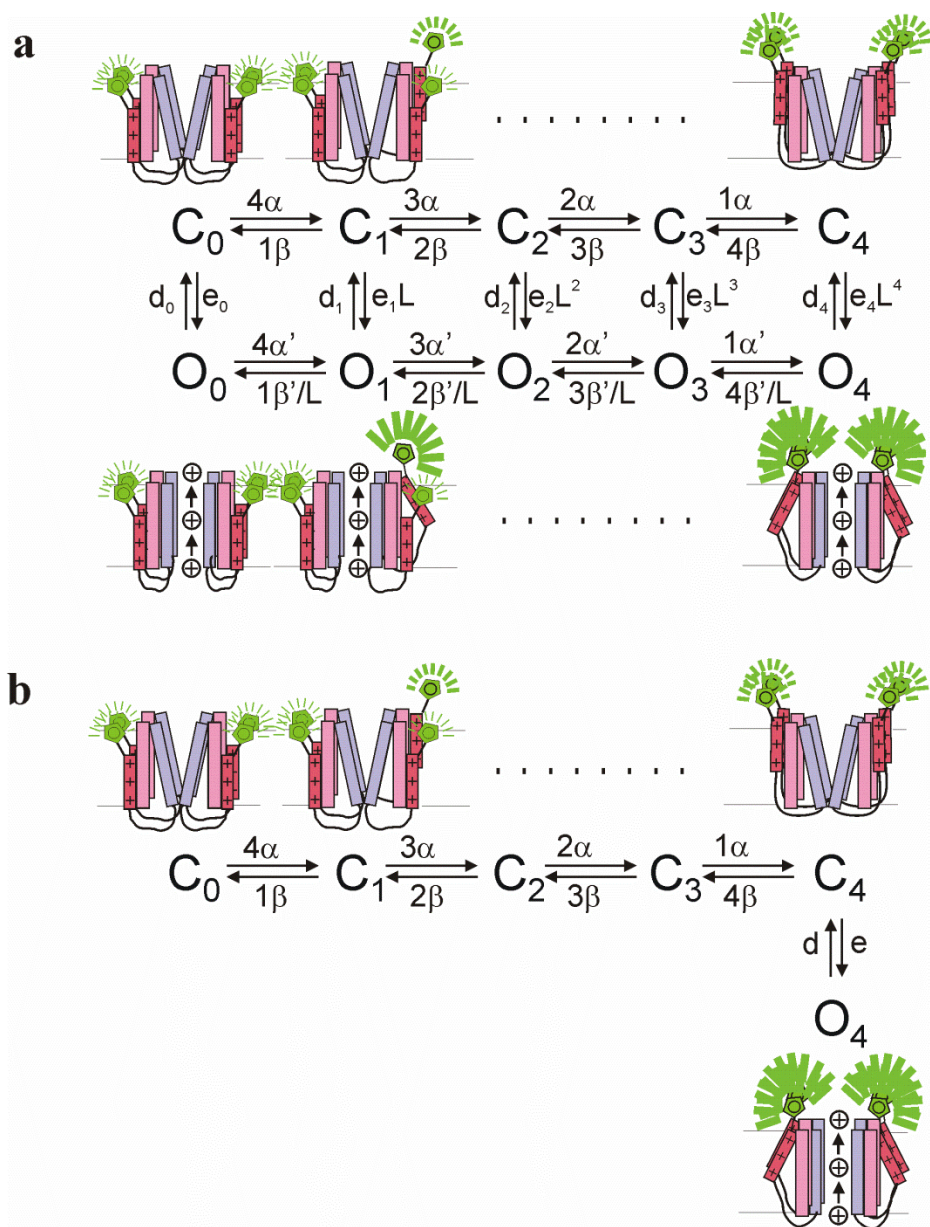

Supplement: supp [file elife-20272-supp-v1.zip › elife_poa_e20272_Figure_3_figure_supplement_1.pdf]
